# Supplementary material
Source: publisher figshare collection journal article supplement (https://acs.figshare.com/ndownloader/files/5843865)
Supplement: Supplementary file 1 [file 5843865]

# **Synthesis, Characterization and Evaluation of Castor oil-based Acylated Derivatives as Potential Lubricant Base Stocks**

**Gorla Geethanjali, Korlipara V. Padmaja, Rachapudi B. N. Prasad\***

**Centre for Lipid Research, CSIR-Indian Institute of Chemical Technology,  
Hyderabad 500 007, Andhra Pradesh, India.**

**Correspondence to:**

**E-mail address: [rbnprasad@iict.res.in](mailto:rbnprasad@iict.res.in) (R.B.N. Prasad).**

**Tel.: +91 040 27193179; fax: +91 040 27193370.**

**Table S1: Physico-Chemical and Lubricant Properties of Acylated Derivatives of Castor Oil**

| <b>Property</b>            | <b>AcECO</b> | <b>PrECO</b> | <b>BuECO</b> | <b>HxECO</b> |
|----------------------------|--------------|--------------|--------------|--------------|
| Density                    | 0.9592       | 0.9614       | 0.9641       | 0.9655       |
| Specific gravity           | 0.9701       | 0.9650       | 0.9622       | 0.9564       |
| Hydroxyl Value             | 0.55         | 0.82         | 0.75         | 2.35         |
| Kinematic 40(°C)           | 112.6        | 114.4        | 117.6        | 125.1        |
| Viscosity(cSt) 100(°C)     | 14.84        | 14.67        | 15.14        | 15.40        |
| Viscosity Index            | 136          | 132          | 134          | 129          |
| Pour Point (°C)            | - 24         | - 21         | -30          | -27          |
| Copper strip corrosion     | 1a           | 1a           | 1a           | 1a           |
| Flash point (°C)           | 262          | 272          | 278          | 280          |
| NOACK evaporation loss (%) | 3.25         | 3.39         | 3.56         | 3.92         |
| Air release value (min)    | 15.80        | 17.00        | 21.55        | 22.29        |
| RPVOT (min)                | 15           | 15           | 15           | 10           |
| Weld Load (Kg)             | 150          | 160          | 160          | 170          |

**Table S2: Physico-Chemical and Lubricant Properties of Methyl 12-Acyloxy Octadecenoate-Rich Fatty Acid Methyl Esters**

| <b>Property</b>          | <b>PrECFAME</b>    | <b>BuECFAME</b> | <b>HxECFAME</b> |
|--------------------------|--------------------|-----------------|-----------------|
| Density 15°C             | 0.9277             | 0.9289          | 0.9307          |
| Specific gravity         | 0.9365             | 0.9297          | 0.9153          |
| Kinematic 40 °C          | 8.221              | 8.750           | 8.961           |
| Viscosity 100°C<br>(cSt) | 2.470              | 2.560           | 2.651           |
| Viscosity Index          | 122.75             | 130.93          | 139.12          |
| Pour Point (°C)          | -21                | -18             | -18             |
| Copper strip corrosion   | 1a                 | 1a              | 1a              |
| Flash point (°C)         | 222                | 222             | 222             |
| NOACK                    | 37.36              | 36.21           | 23.40           |
| Evaporation loss (%)     |                    |                 |                 |
| Air release value (min)  | 0.38               | 0.48            | 0.58            |
| RPVOT (min)              | 5                  | 5               | 10              |
| Emulsion characteristics | 40:40:0 (3<br>min) | 40:40:0 (4 min) | 40:40:0 (5 min) |
| Weld Load (Kg)           | 130                | 140             | 140             |

**Table S3: Physico-Chemical and Lubricant Properties of 2-Ethyl-hexyl 12-Acyloxy Octadecenoate-Rich Fatty Acid Esters**

| <b>Property</b>            |       | <b>PrECFA2EtHE</b> | <b>BuECFA2EtHE</b> | <b>HxECFA2EtHE</b> |
|----------------------------|-------|--------------------|--------------------|--------------------|
| Density                    | 15°C  | 0.91461            | 0.90867            | 0.90988            |
| Specific gravity           | 15 °C | 0.91543            | 0.90949            | 0.90770            |
| Hydroxyl Value             |       | 1.35               | 0.79               | 0.53               |
| Kinematic Viscosity (cSt)  | 40 °C | 8.641              | 10.55              | 12.59              |
|                            | 100°C | 3.541              | 3.651              | 3.777              |
| Viscosity Index            |       | 144.82             | 148.91             | 155.69             |
| Pour Point (°C)            |       | -36                | -39                | -39                |
| Copper strip corrosion     |       | 1a                 | 1a                 | 1a                 |
| Flash point (°C)           |       | 182                | 182                | 174                |
| NOACK evaporation loss (%) |       | 22.87              | 23.27              | 24.27              |
| Air release value (min)    |       | 0.55               | 0.81               | 0.99               |
| RPVOT (min)                |       | 5                  | 7.5                | 10                 |
| Emulsion characteristics   |       | 40:40:0 (1 min)    | 40:40:0 (1 min)    | 40:40:0 (5 min)    |
| Weld Load (Kg)             |       | 140                | 150                | 150                |

**ASTM method (D 445 – 01): Standard Test Method for Kinematic Viscosity of Transparent and Opaque Liquids (the Calculation of Dynamic Viscosity)**

The method of calculation of viscosity measurements were carried out according to ASTM method (D 445 – 01). According to the method, in section **10.2.2**: If the two determinations of kinematic viscosity, calculated from the flow time measurements, agree within the stated determinability figure for the product, use the average of these determinations to calculate the kinematic viscosity result to be reported. Record the result. If the determinations of kinematic viscosity do not agree within the stated determinability, repeat the measurements of flow times after thorough cleaning and drying of the viscometers and filtering of the sample.

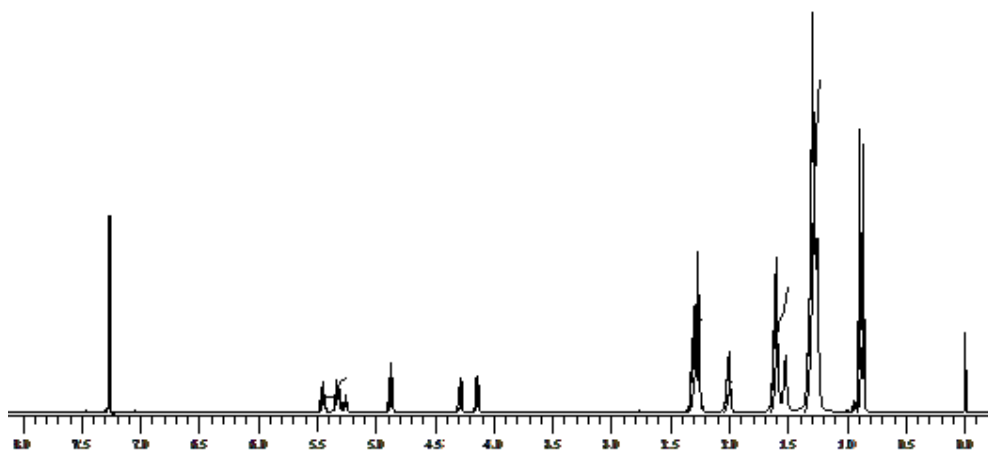

**Figure S1:  $^1\text{H}$  NMR Spectrum of Butanoylated Castor Oil**

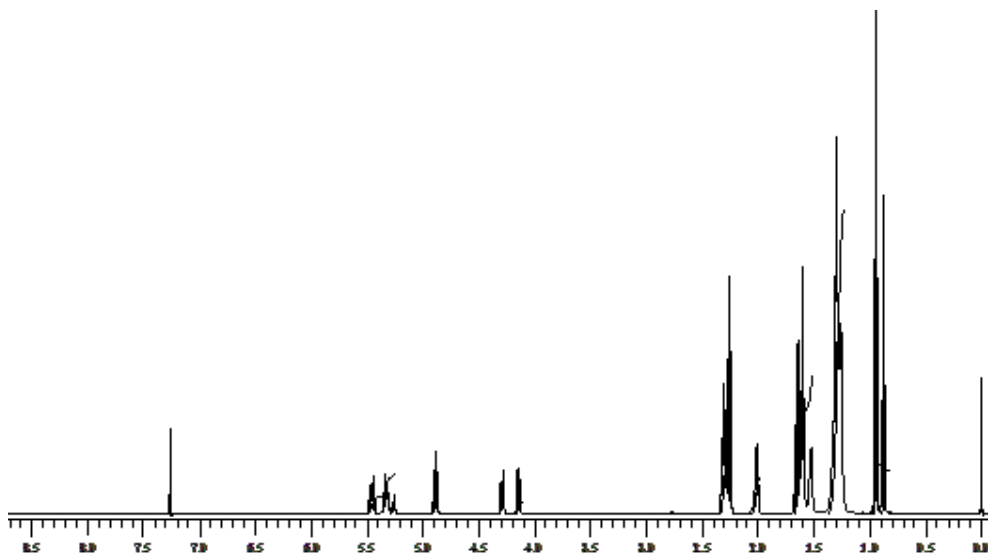

**Figure S2:  $^1\text{H}$  NMR Spectrum of Hexanoylated Castor Oil**

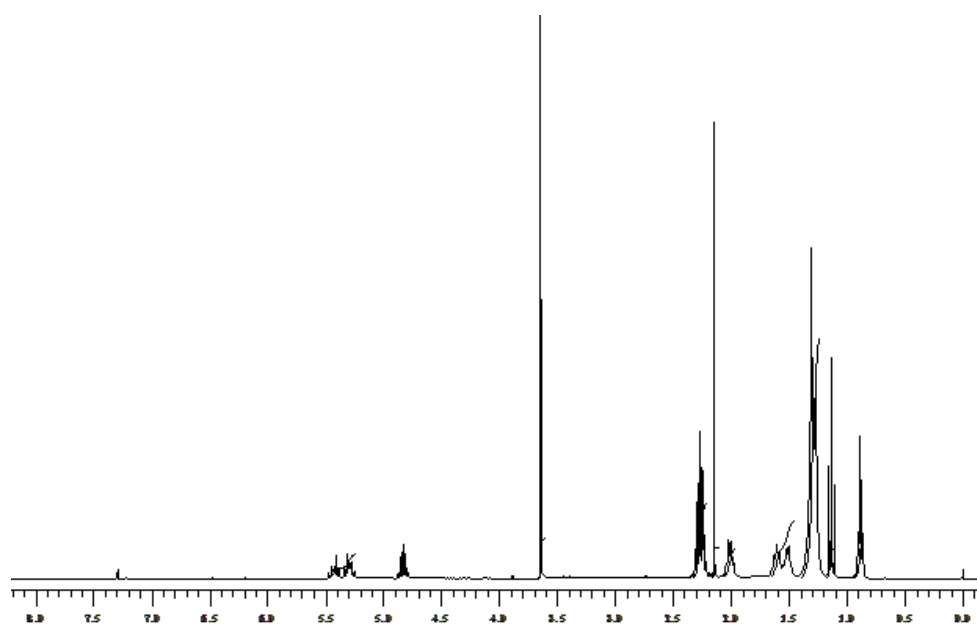

**Figure S3:  $^1\text{H}$  NMR Spectrum of Butanoylated Castor Fatty Acid Methyl Esters**

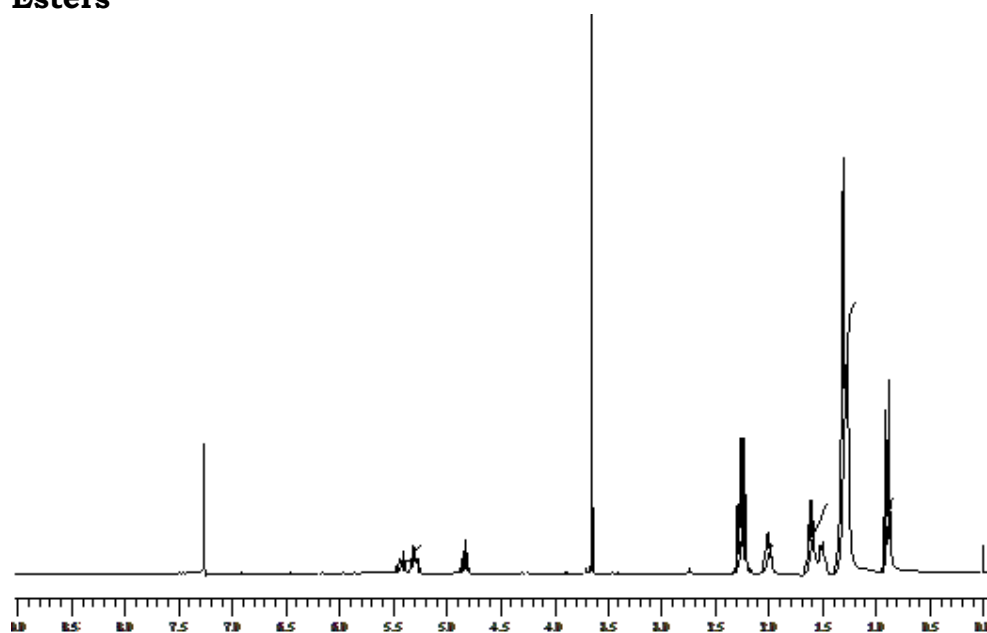

**Figure S4:  $^1\text{H}$  NMR Spectrum of Hexanoylated Castor Fatty Acid Methyl Esters**

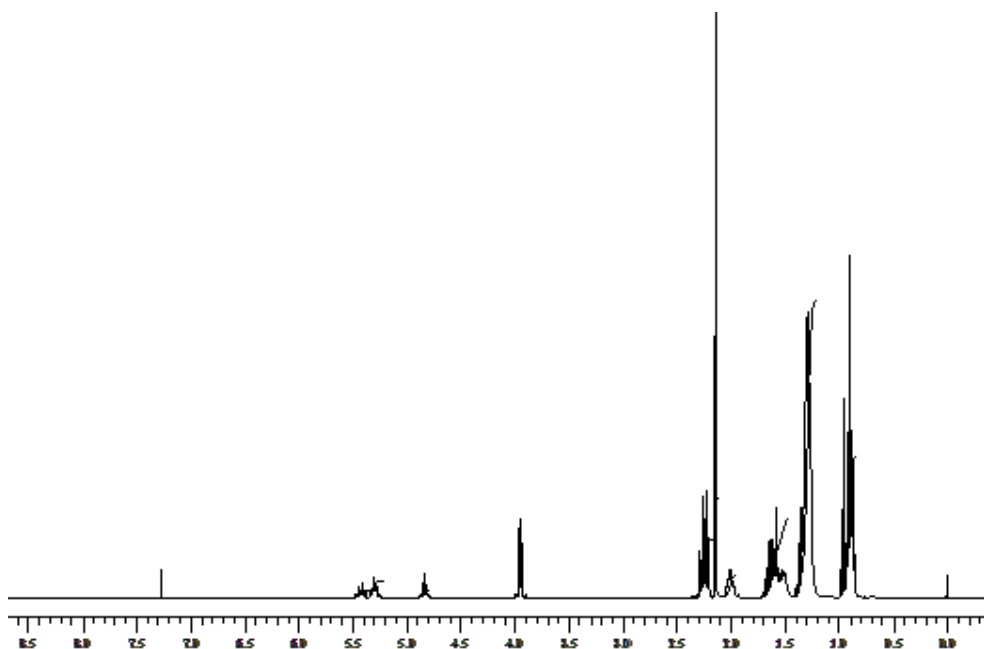

**Figure S5:  $^1\text{H}$  NMR Spectrum of Butanoylated Castor Fatty Acid 2-Ethylhexyl Esters**

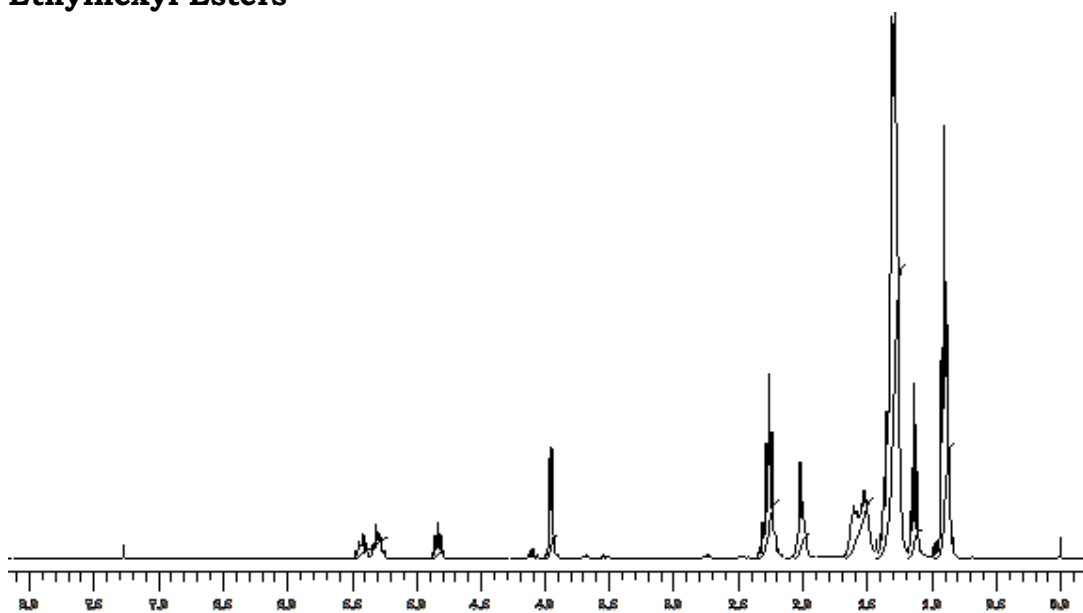

**Figure S6:  $^1\text{H}$  NMR Spectrum of Hexanoylated Castor Fatty Acid 2-Ethylhexyl Esters**



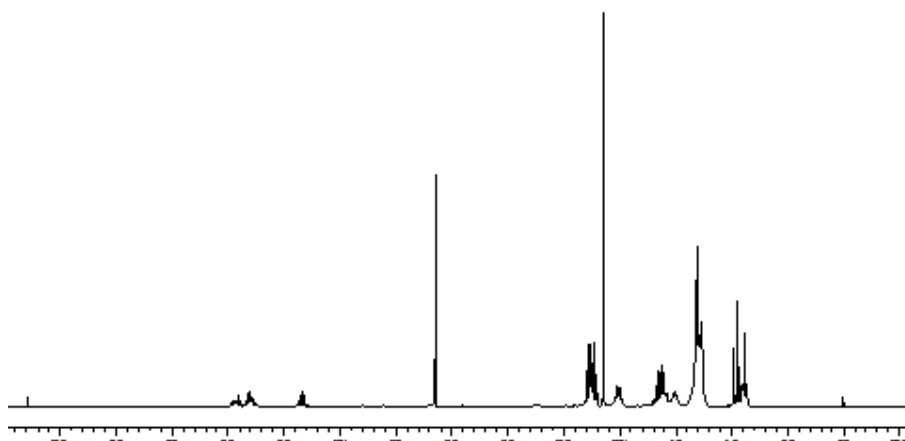

**Figure S7: <sup>1</sup>H NMR Spectrum of Propionylated Castor Fatty Acid Methyl Esters**

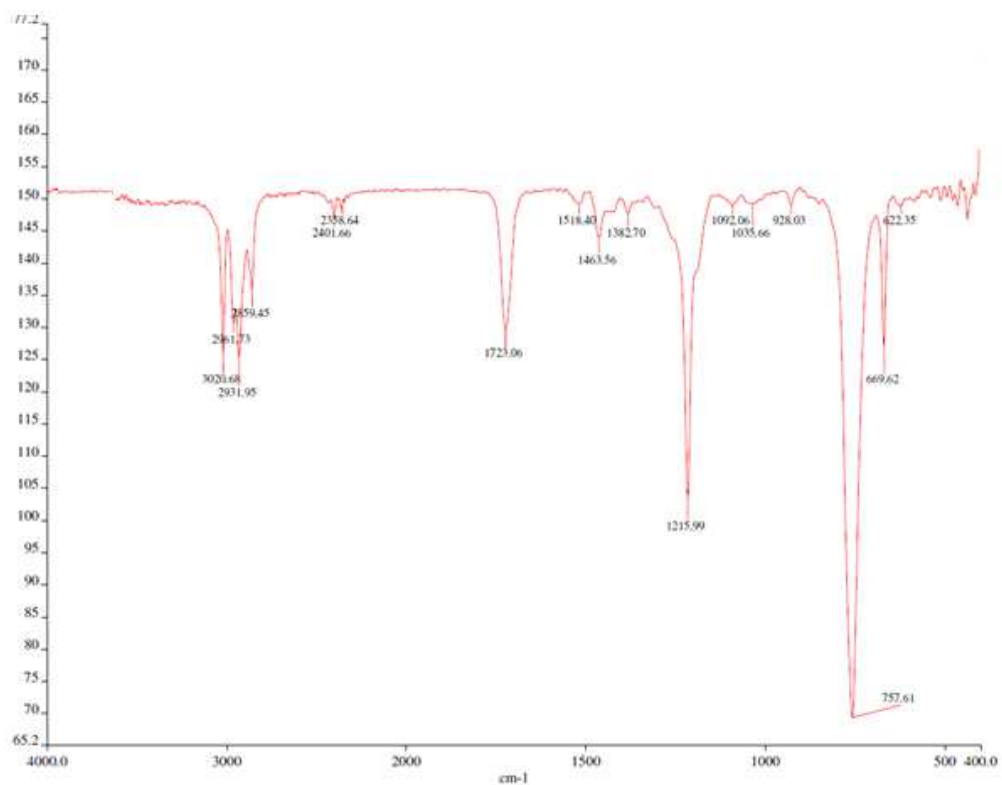

**Figure S8: FTIR Spectra of Butanoylated Castor Fatty Acid 2-Ethylhexyl Esters**

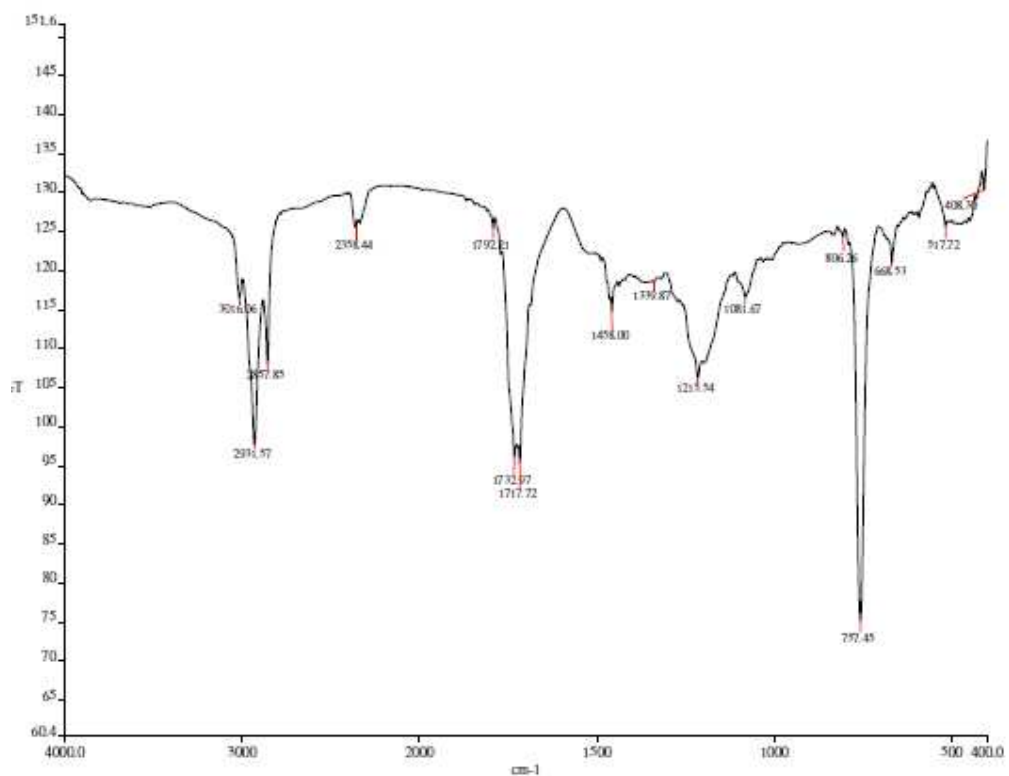

**Figure S9: FTIR Spectra of Propionylated Esters of Castor Oil**

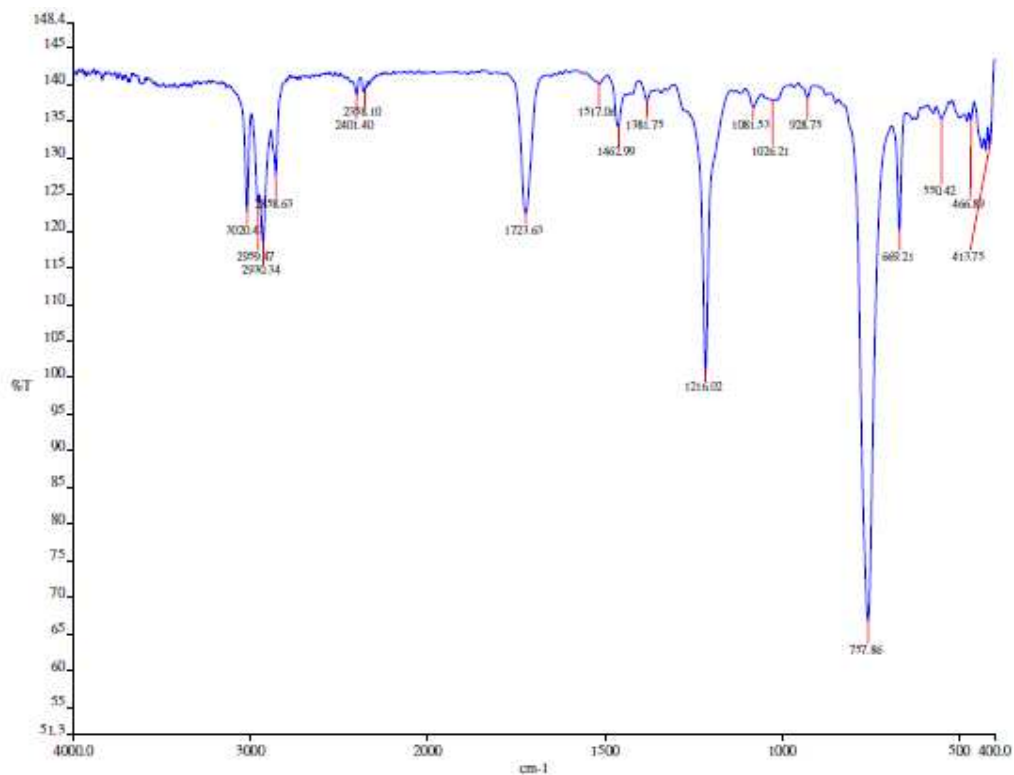

**Figure S10: FTIR Spectra of Propionylated Castor Fatty Acid 2-Ethylhexyl Esters**

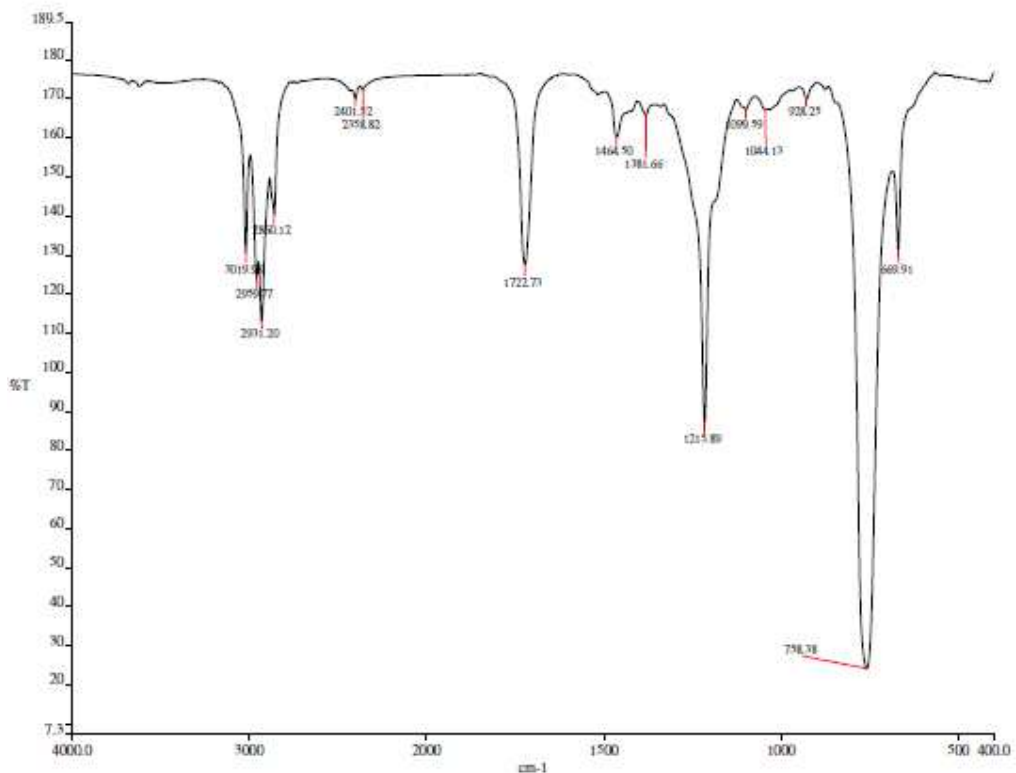

**Figure S11: FTIR Spectra of Hexanoylated Castor Fatty Acid 2-Ethylhexyl Esters**

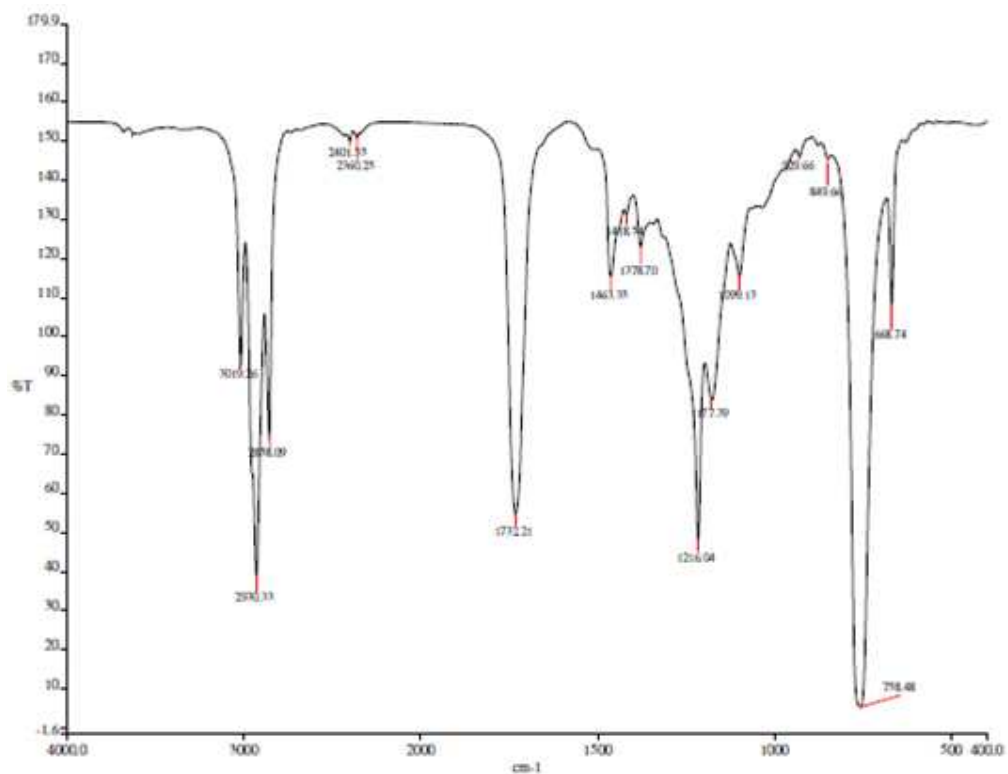

**Figure S12: FTIR Spectra of Hexanoylated Esters of Castor Oil**
